# Supplementary material for: Ionic immune suppression within the tumour microenvironment limits T cell effector function
Source: Springer Nature journal article supplement (doi:10.1038/nature19364), 2016-09-13

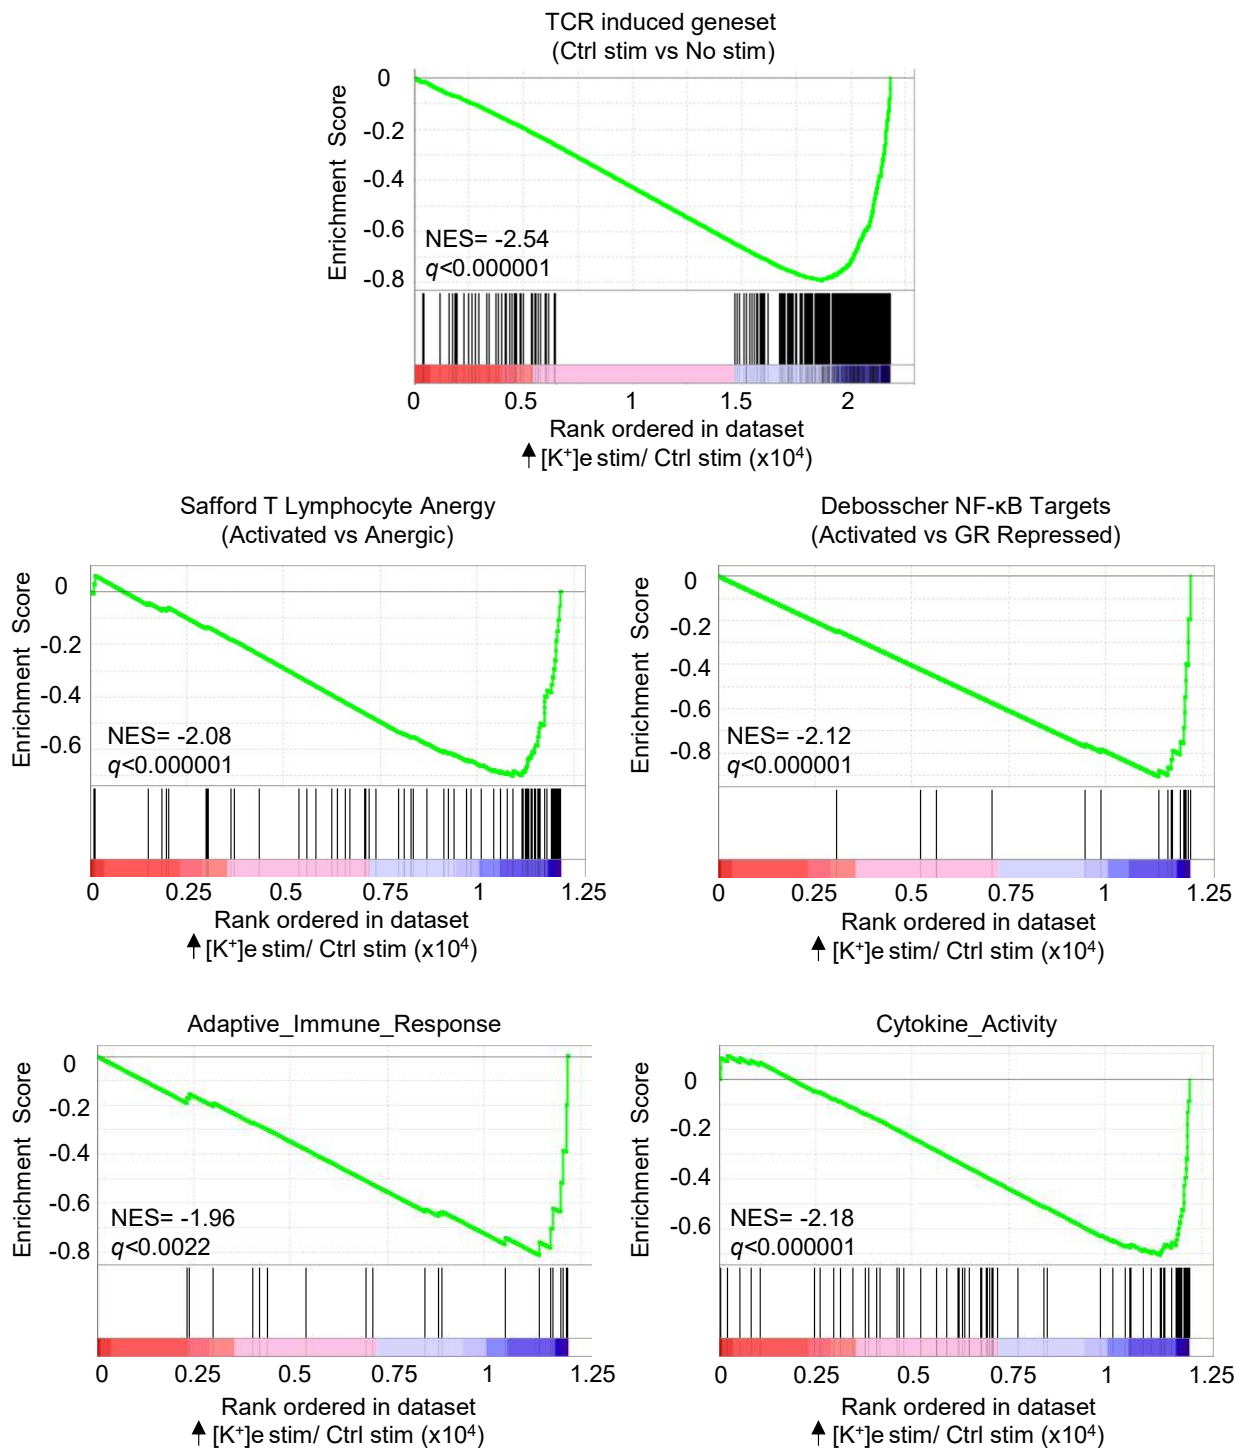

**Supplementary Information 1. Elevated [K<sup>+</sup>]e limits TCR induction of transcriptional programs required for effector T cell function.**

(a-e) Gene set enrichment analysis against the indicated dataset of transcriptional logarithmic ratiometric differences between primed T cells briefly activated in the presence or absence of elevated [K<sup>+</sup>]e (Elevated [K<sup>+</sup>]e stim / Ctrl stim). Kolmogorov-Smirnov statistic was used to calculate statistical significance. Additional [K<sup>+</sup>]e equal to 40 mM.

|                                                             |              | TCR Stim             | +      | +     | -     | -    |
|-------------------------------------------------------------|--------------|----------------------|--------|-------|-------|------|
|                                                             |              | ↑ [K <sup>+</sup> ]e | -      | +     | -     | +    |
| Voltage-gated delayed rectified "Shaker" related            | <i>Kcna1</i> | 0.00                 | 0.00   | 0.00  | 0.00  | 0.00 |
|                                                             | <i>Kcna2</i> | 0.29                 | 0.32   | 2.04  | 1.86  |      |
|                                                             | <i>Kcna3</i> | 183.95               | 133.06 | 46.80 | 48.47 |      |
|                                                             | <i>Kcna4</i> | 0.00                 | 0.01   | 0.02  | 0.01  |      |
|                                                             | <i>Kcna5</i> | 0.01                 | 0.00   | 0.00  | 0.00  |      |
|                                                             | <i>Kcna6</i> | 0.00                 | 0.00   | 0.00  | 0.00  |      |
|                                                             | <i>Kcna7</i> | 0.32                 | 0.33   | 0.00  | 0.00  |      |
| Voltage-gated "Shaw" related                                | <i>Kcnc1</i> | 0.15                 | 0.28   | 0.93  | 0.71  |      |
|                                                             | <i>Kcnc2</i> | 0.00                 | 0.00   | 0.00  | 0.00  |      |
|                                                             | <i>Kcnc3</i> | 0.12                 | 0.11   | 0.01  | 0.04  |      |
|                                                             | <i>Kcnc4</i> | 0.00                 | 0.00   | 0.00  | 0.00  |      |
| Intermediate / small conductance Ca <sup>2+</sup> activated | <i>Kcnn1</i> | 0.00                 | 0.02   | 0.00  | 0.02  |      |
|                                                             | <i>Kcnn2</i> | 0.00                 | 0.00   | 0.00  | 0.00  |      |
|                                                             | <i>Kcnn3</i> | 0.00                 | 0.00   | 0.00  | 0.00  |      |
|                                                             | <i>Kcnn4</i> | 91.15                | 76.47  | 90.00 | 90.73 |      |

|                         |                                       | TCR Stim             | +     | +    | -    | -    |  |
|-------------------------|---------------------------------------|----------------------|-------|------|------|------|--|
|                         |                                       | ↑ [K <sup>+</sup> ]e | -     | +    | -    | +    |  |
| Two-pore domain channel | <i>Kcnk1</i>                          | 0.01                 | 0.00  | 0.01 | 0.00 |      |  |
|                         | <i>Kcnk2</i>                          | 0.00                 | 0.00  | 0.00 | 0.00 |      |  |
|                         | <i>Kcnk3</i>                          | 0.03                 | 0.02  | 0.01 | 0.00 |      |  |
|                         | <i>Kcnk4</i>                          | 0.01                 | 0.00  | 0.00 | 0.00 |      |  |
|                         | <i>Kcnk5</i>                          | 20.78                | 22.21 | 4.46 | 4.58 |      |  |
|                         | <i>Kcnk6</i>                          | 1.83                 | 2.23  | 2.16 | 2.41 |      |  |
|                         | <i>Kcnk7</i>                          | 0.41                 | 0.58  | 1.02 | 0.86 |      |  |
|                         | <i>Kcnk9</i>                          | 0.00                 | 0.00  | 0.00 | 0.00 |      |  |
|                         | <i>Kcnk10</i>                         | 1.12                 | 0.44  | 0.09 | 0.10 |      |  |
|                         | <i>Kcnk12</i>                         | 0.15                 | 0.11  | 0.01 | 0.01 |      |  |
|                         | Inwardly-rectifying slowly activating | <i>Kcnh3</i>         | 0.03  | 0.05 | 0.04 | 0.04 |  |
|                         |                                       | <i>Kcnh4</i>         | 2.91  | 2.17 | 0.07 | 0.03 |  |
| <i>Kcnh8</i>            |                                       | 0.00                 | 0.00  | 0.00 | 0.00 |      |  |

|                                                              |                | TCR Stim             | +      | +      | -      | - |
|--------------------------------------------------------------|----------------|----------------------|--------|--------|--------|---|
|                                                              |                | ↑ [K <sup>+</sup> ]e | -      | +      | -      | + |
| Alpha-subunit Na <sup>+</sup> ,K <sup>+</sup> ATPase         | <i>Atp1a1</i>  | 304.94               | 239.26 | 99.95  | 100.20 |   |
|                                                              | <i>Atp1a2</i>  | 0.00                 | 0.00   | 0.00   | 0.00   |   |
|                                                              | <i>Atp1a3</i>  | 0.07                 | 0.09   | 0.51   | 0.52   |   |
|                                                              | <i>Atp1a4</i>  | 0.00                 | 0.00   | 0.00   | 0.00   |   |
| Beta-subunit Na <sup>+</sup> ,K <sup>+</sup> ATPase          | <i>Atp1b1</i>  | 17.46                | 12.26  | 14.52  | 14.32  |   |
|                                                              | <i>Atp1b2</i>  | 0.57                 | 0.51   | 0.07   | 0.06   |   |
|                                                              | <i>Atp1b3</i>  | 141.85               | 152.37 | 373.08 | 372.90 |   |
|                                                              | <i>Atp1b4</i>  | 0.00                 | 0.00   | 0.00   | 0.00   |   |
| Fxyd domain containing ion transport regulator               | <i>Fxyd1</i>   | 0.74                 | 0.58   | 0.21   | 0.57   |   |
|                                                              | <i>Fxyd2</i>   | 0.19                 | 0.00   | 0.14   | 0.03   |   |
|                                                              | <i>Fxyd3</i>   | 0.00                 | 0.00   | 0.00   | 0.00   |   |
|                                                              | <i>Fxyd4</i>   | 0.21                 | 0.08   | 0.14   | 0.23   |   |
|                                                              | <i>Fxyd5</i>   | 478.10               | 398.84 | 454.65 | 424.89 |   |
|                                                              | <i>Fxyd6</i>   | 0.01                 | 0.00   | 0.01   | 0.01   |   |
| Electro-neutral K <sup>+</sup> , Cl <sup>-</sup> transporter | <i>Slc12a1</i> | 0.00                 | 0.00   | 0.00   | 0.00   |   |
|                                                              | <i>Slc12a2</i> | 8.11                 | 8.88   | 3.41   | 3.17   |   |
|                                                              | <i>Slc12a3</i> | 0.01                 | 0.01   | 0.01   | 0.02   |   |
|                                                              | <i>Slc12a4</i> | 14.74                | 15.23  | 6.05   | 5.68   |   |
|                                                              | <i>Slc12a5</i> | 0.06                 | 0.08   | 0.03   | 0.03   |   |
|                                                              | <i>Slc12a6</i> | 3.67                 | 6.95   | 24.21  | 25.19  |   |
|                                                              | <i>Slc12a7</i> | 6.92                 | 9.61   | 33.83  | 34.88  |   |
|                                                              | <i>Slc12a8</i> | 0.14                 | 0.25   | 0.36   | 0.38   |   |
|                                                              | <i>Slc12a9</i> | 1.58                 | 2.18   | 4.42   | 4.84   |   |

|                                            |               | TCR Stim             | +     | +     | -     | - |
|--------------------------------------------|---------------|----------------------|-------|-------|-------|---|
|                                            |               | ↑ [K <sup>+</sup> ]e | -     | +     | -     | + |
| Voltage-gated beta subunit                 | <i>Kcnab1</i> | 0.03                 | 0.04  | 0.04  | 0.01  |   |
|                                            | <i>Kcnab2</i> | 23.08                | 26.03 | 63.83 | 63.81 |   |
|                                            | <i>Kcnab3</i> | 0.05                 | 0.11  | 0.22  | 0.15  |   |
| K <sub>v</sub> channel interacting protein | <i>Kcnip1</i> | 2.27                 | 2.45  | 0.80  | 0.00  |   |
|                                            | <i>Kcnip2</i> | 0.80                 | 1.78  | 6.54  | 8.50  |   |
|                                            | <i>Kcnip3</i> | 0.03                 | 0.08  | 0.05  | 0.10  |   |
|                                            | <i>Kcnip4</i> | 0.45                 | 0.46  | 0.62  | 0.68  |   |

**Supplementary Information 2. TCR dependent dynamic expression of potassium channels and pumps.**

Averaged RPKM (Reads per kilobase per megabase) normalized values from three biological replicates of selected transcripts from FACS purified mouse CD8<sup>+</sup> T cells in the indicated condition with or without 2 hour TCR stimulation via anti-CD3/28, additional [K<sup>+</sup>]e equal to 40mM and being isotonic to RPMI 1640.

Figure 1e

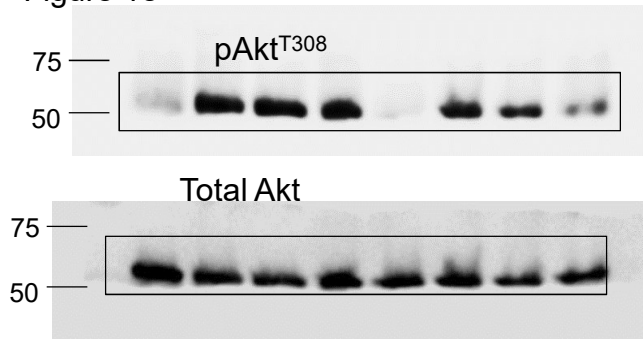

Extended Data 3c

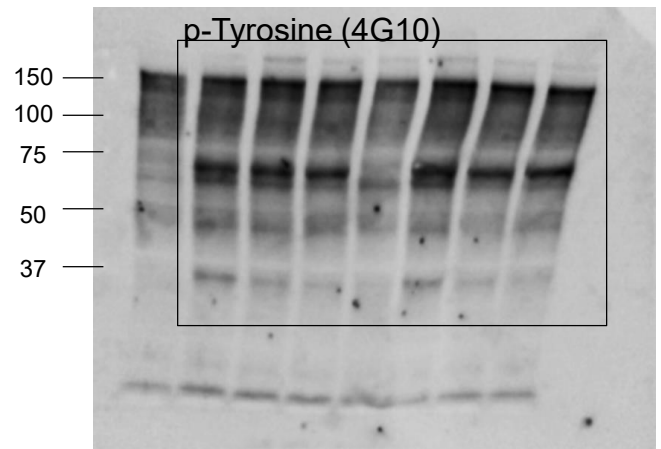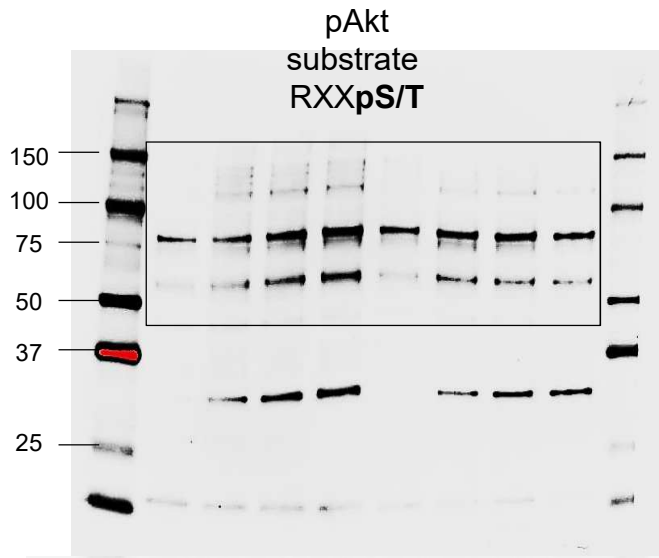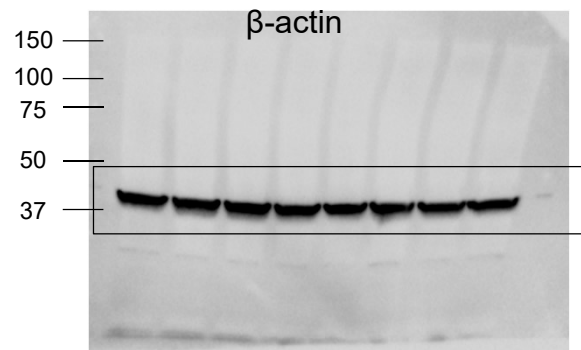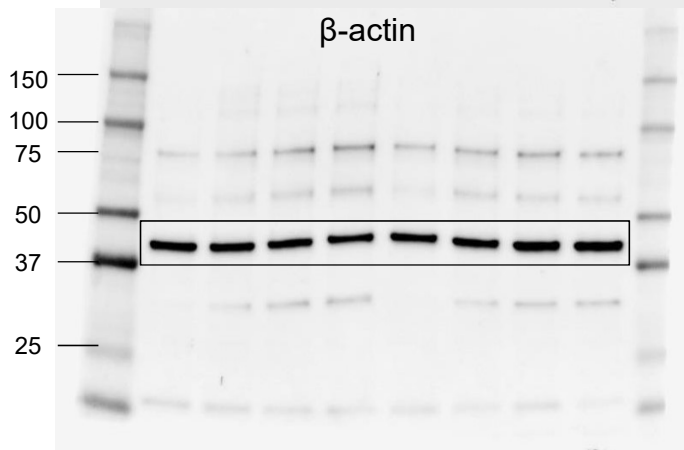

Figure 4b

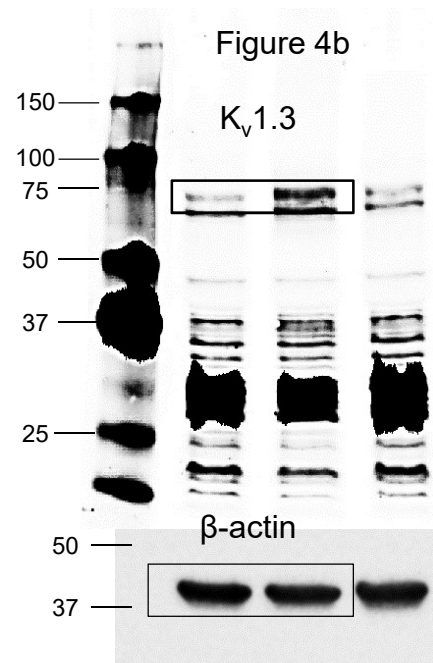

Supplement: 41586_2016_BFnature19364_MOESM341_ESM.pdf [file 41586_2016_BFnature19364_MOESM341_ESM.pdf]
